# Supplementary material for: Construction of carbon dots/metal–organic framework composite for ratiometric sensing of norfloxacin
Source: Royal Society of Chemistry journal article supplement (doi:10.1039/d2tc03414j), 2022-01-01
Supplement: d2tc03414j1.pdf [file d2tc03414j1.pdf]

## Supporting Information

# Construction of Carbon Dots/Metal-Organic Framework Composite for Ratio Sensing of Norfloxacin

Shixin Wu,<sup>a</sup> Chun Chen,<sup>a</sup> Jiahao Chen,<sup>a</sup> Wei Li,<sup>a</sup> Minhua Sun,<sup>a</sup> Jiechun Zhuang,<sup>a</sup> Junjie Lin,<sup>a</sup>

Yingliang Liu,<sup>a</sup> Hong Xu,<sup>a</sup> Mingtao Zheng,<sup>\*ab</sup> Xuejie Zhang,<sup>ab</sup> Bingfu Lei <sup>\*ab</sup> and Haoran Zhang

<sup>\*ab</sup>

<sup>1</sup> *Key Laboratory for Biobased Materials and Energy of Ministry of Education, College of Materials and Energy, South China Agricultural University, Guangzhou 510642, P. R. China*

<sup>2</sup> *Maoming Branch, Guangdong Laboratory for Lingnan Modern Agriculture, Guangdong Maoming 525100, P. R. China*

## Supporting Figures

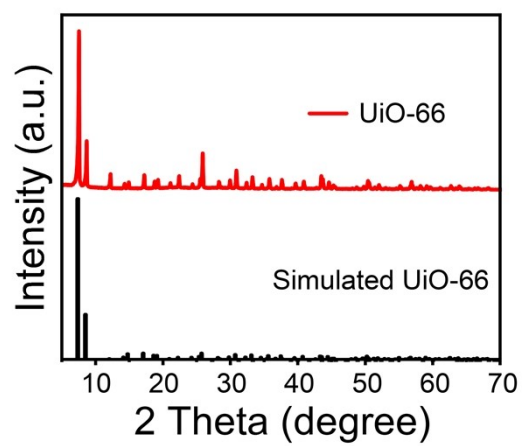

**Figure S1.** The PXRD patterns of UiO-66 and simulated UiO-66.

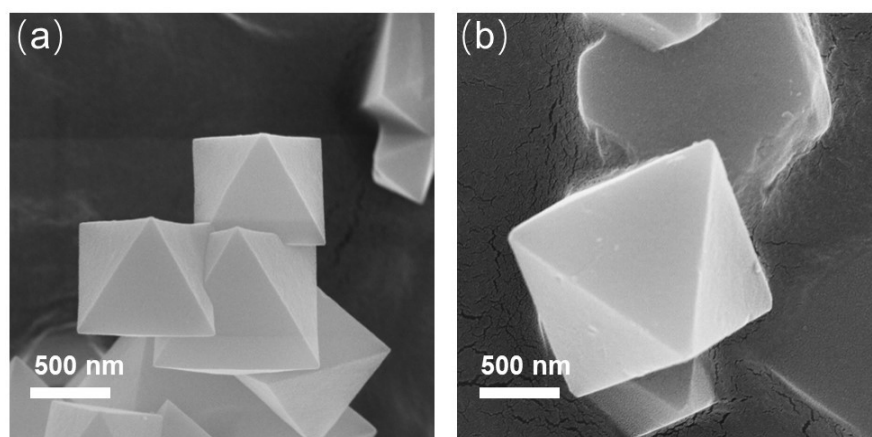

**Figure S2.** The SEM image of (a) UiO-66 and (b) g-CDs@UiO-66.

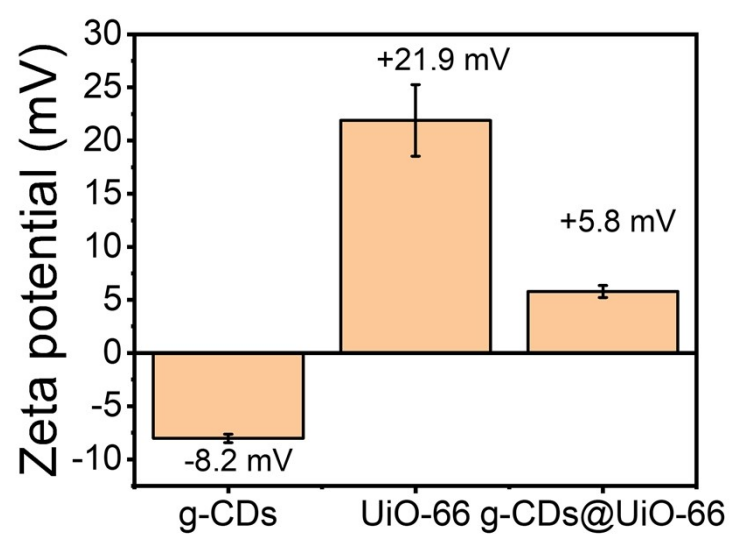

**Figure S3.** Zeta potential of g-CDs, UiO-66, g-CDs@UiO-66.

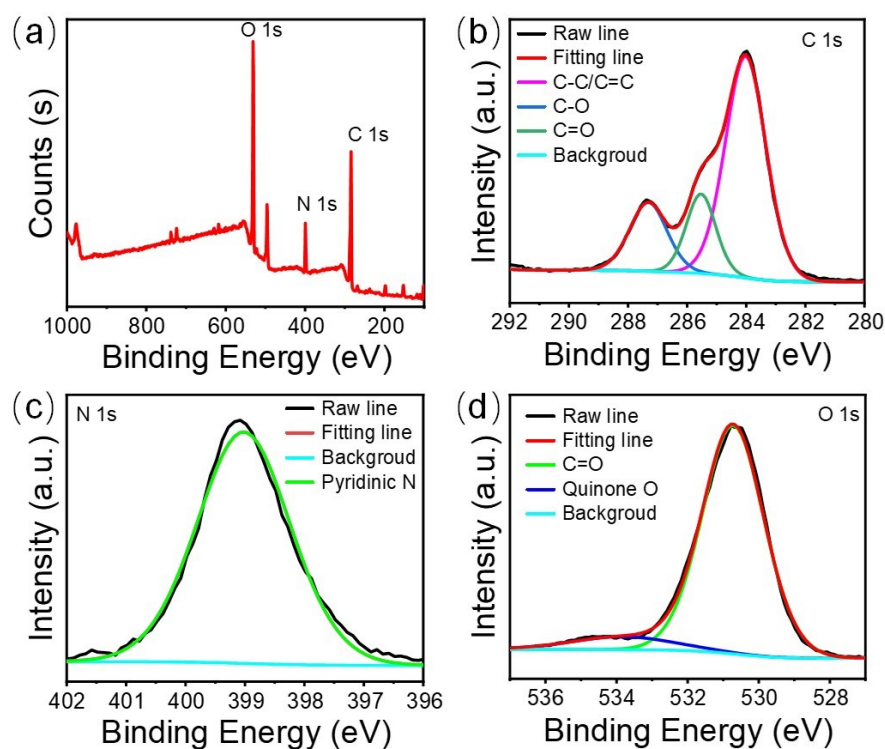

**Figure S4.** XPS survey pattern of g-CDs. (b-d) High-resolution C 1s, N 1s, O 1s XPS spectra of g-CDs.

**Table S1**

Specific surface area and pore size of samples

| Samples      | $S_{\text{BET}}$ ( $\text{m}^2/\text{g}$ ) | $V$ ( $\text{cm}^3/\text{g}$ ) | $D$ (nm) |
|--------------|--------------------------------------------|--------------------------------|----------|
| UiO-66       | 1035                                       | 0.41                           | 1.58     |
| g-CDs@UiO-66 | 1343                                       | 0.53                           | 1.59     |
